# Supplementary material
Source: PubMed Central journal article supplement (PMC5014229)
Supplement: NIHMS806462-supplement-Highlights.pdf [file NIHMS806462-supplement-Highlights.pdf]

## **Highlights**

- i) HDAC2 levels are increased in NPC disease models.
- ii) c-Abl inhibition prevents the increase of HDAC2 in NPC disease models.
- iii) Cholesterol and oxidative stress are upstream regulators of the c-Abl/HDAC2 pathway.
- iv) c-Abl inhibition prevents the HDAC2-dependent gene repression in NPC models.
